# Supplementary material for: Association between Geriatric Nutrition Risk Index and The Presence of Sarcopenia in People with Type 2 Diabetes Mellitus: A Cross-Sectional Study
Source: MDPI journal article supplement (doi:10.3390/nu13113729), 2021-10-22
Supplement: s1 [file s1]

**Table S1. Clinical characteristics according to geriatric nutritional risk index separated by sex**

|                                      | Men                       |                       |           | Women                     |                      |           |
|--------------------------------------|---------------------------|-----------------------|-----------|---------------------------|----------------------|-----------|
|                                      | GNRI $\geq 98$<br>N = 282 | GNRI $< 98$<br>N = 19 | <i>p</i>  | GNRI $\geq 98$<br>N = 217 | GNRI $< 98$<br>N = 8 | <i>p</i>  |
| Age (years)                          | 67.3 (10.9)               | 73.5 (8.4)            | 0.016     | 65.9 (10.9)               | 72.5 (7.0)           | 0.092     |
| Duration of diabetes (years)         | 15.1 (9.7)                | 16.6 (11.9)           | 0.540     | 13.6 (10.7)               | 15.0 (11.1)          | 0.714     |
| Family history of diabetes (-/+)     | 175/107                   | 11/8                  | 0.096     | 111/106                   | 5/3                  | 0.787     |
| Height (cm)                          | 167.2 (5.8)               | 162 (5.6)             | 0.002     | 153.3 (5.8)               | 156.0 (2.7)          | 0.200     |
| Body weight (kg)                     | 67.8 (11.2)               | 52.2 (6.8)            | $< 0.001$ | 59.3 (12.4)               | 45.0 (6.3)           | 0.001     |
| Body mass index (kg/m <sup>2</sup> ) | 24.2 (3.5)                | 19.7 (2.4)            | $< 0.001$ | 25.2 (5.0)                | 18.5 (2.6)           | $< 0.001$ |
| SBP (mmHg)                           | 131.8 (16.5)              | 136.3 (26.9)          | 0.281     | 134.8 (19.2)              | 127.5 (16.7)         | 0.292     |
| DBP (mmHg)                           | 77.0 (11.7)               | 71.7 (18.9)           | 0.070     | 76.7 (12.3)               | 69.0 (14.0)          | 0.086     |
| Insulin (-/+)                        | 217/65                    | 11/8                  | 0.110     | 165/52                    | 4/4                  | 0.209     |
| SGLT2 inhibitor (-/+)                | 229/53                    | 18/1                  | 0.238     | 176/41                    | 8/0                  | 0.372     |
| GLP-1 antagonist (-/+)               | 242/40                    | 18/1                  | 0.452     | 177/40                    | 6/2                  | 0.995     |
| Antihypertensive drugs (-/+)         | 125/157                   | 7/12                  | 0.691     | 104/113                   | 5/3                  | 0.653     |
| Presence of hypertension (-/+)       | 98/184                    | 5/14                  | 0.617     | 72/145                    | 3/5                  | 1.000     |
| Smoking (-/+)                        | 226/56                    | 13/6                  | 0.353     | 202/15                    | 8/0                  | 0.962     |
| Habit of exercise (-/+)              | 139/143                   | 11/8                  | 0.625     | 118/99                    | 8/0                  | 0.029     |
| HbA1c (mmol/mol)                     | 56.6 (11.9)               | 63.9 (21.6)           | 0.016     | 56.5 (12.6)               | 72.5 (32.5)          | 0.001     |
| HbA1c (%)                            | 7.3 (1.1)                 | 8.0 (2.0)             | 0.016     | 7.3 (1.1)                 | 8.8 (3.0)            | 0.001     |

|                                    |                 |                   |        |                  |                   |        |
|------------------------------------|-----------------|-------------------|--------|------------------|-------------------|--------|
| Plasma glucose (mmol/L)            | 8.4 (2.5)       | 9.9 (5.0)         | 0.023  | 8.0 (2.5)        | 9.9 (3.5)         | 0.034  |
| Creatinine (umol/L)                | 83.9 (32.8)     | 104.8 (65.8)      | 0.014  | 59.2 (19.0)      | 56.9 (10.5)       | 0.734  |
| eGFR (mL/min/1.73 m <sup>2</sup> ) | 68.0 (19.6)     | 61.8 (28.3)       | 0.198  | 72.5 (18.8)      | 70.2 (13.4)       | 0.730  |
| Uric acid (mmol/L)                 | 328.7 (76.4)    | 306.8 (85.8)      | 0.230  | 288.9 (67.3)     | 228.3 (36.8)      | 0.012  |
| Triglycerides (mmol/L)             | 1.6 (1.0)       | 1.2 (0.5)         | 0.080  | 1.4 (0.8)        | 1.4 (0.9)         | 0.892  |
| HDL cholesterol (mmol/L)           | 1.5 (0.4)       | 1.7 (0.6)         | 0.047  | 1.6 (0.4)        | 1.5 (0.6)         | 0.307  |
| C-reactive protein (ug/L)          | 1616.0 (3694.2) | 15389.5 (31230.6) | <0.001 | 2747.6 (11063.3) | 17537.5 (31528.0) | <0.001 |
| Albumin (mg/L)                     | 43.2 (3.0)      | 35.3 (4.0)        | <0.001 | 42.6 (2.9)       | 35.8 (5.3)        | <0.001 |
| GNRI                               | 116.1 (8.6)     | 94.7 (6.0)        | <0.001 | 117.4 (10.4)     | 92.8 (5.0)        | <0.001 |
| Body fat mass (kg)                 | 18.0 (7.3)      | 9.6 (5.4)         | <0.001 | 21.5 (9.0)       | 11.2 (4.0)        | 0.001  |
| Percent body fat mass (%)          | 25.9 (6.9)      | 17.7 (8.3)        | <0.001 | 35.1 (7.7)       | 24.3 (6.4)        | <0.001 |
| Appendicular muscle mass (kg)      | 21.1 (3.1)      | 18.0 (2.5)        | <0.001 | 15.0 (2.6)       | 12.7 (1.9)        | 0.013  |
| SMI (kg/m <sup>2</sup> )           | 7.5 (0.8)       | 6.8 (0.8)         | <0.001 | 6.4 (0.9)        | 5.2 (0.7)         | <0.001 |
| Low skeletal muscle mass (-/+)     | 217/65          | 6/13              | <0.001 | 172/45           | 3/5               | 0.018  |
| Handgrip strength (kg)             | 33.6 (7.6)      | 26.7 (7.3)        | <0.001 | 20.8 (5.1)       | 17.2 (4.8)        | 0.049  |
| Low muscle strength (-/+)          | 223/59          | 8/11              | <0.001 | 161/56           | 3/5               | 0.059  |
| Presence of sarcopenia (-/+)       | 248/34          | 11/8              | <0.001 | 196/21           | 4/4               | 0.003  |

Data was expressed as mean (standard deviation) or number. The difference between group was evaluated by Student's t-test or chi-square test. SBP, systolic blood pressure; DBP, diastolic blood pressure; eGFR, estimated glomerular filtration rate; HDL, high-density lipoprotein; GNRI, Geriatric Nutritional Risk Index; SMI, skeletal muscle mass index.

**Table S2. Odds ratio of geriatric nutritional risk index on the presence of sarcopenia according to sex**

| Men                          | Model 1          |          | Model 2          |          | Model 3          |          | Model 4           |          |
|------------------------------|------------------|----------|------------------|----------|------------------|----------|-------------------|----------|
|                              | OR (95%CI)       | <i>p</i> | OR (95%CI)       | <i>p</i> | OR (95%CI)       | <i>p</i> | OR (95%CI)        | <i>p</i> |
| Low GNRI (<98)               | 5.30 (1.99-14.1) | <0.001   | 3.73 (1.25-11.1) | 0.018    | 4.80 (1.52-15.1) | 0.007    | 4.22 (1.26-14.1)  | 0.019    |
| Age (years)                  | -                | -        | 1.15 (1.10-1.21) | <0.001   | 1.14 (1.08-1.2)  | <0.001   | 1.14 (1.08-1.20)  | <0.001   |
| Duration of diabetes (years) | -                | -        | -                | -        | 1.03 (0.99-1.07) | 0.184    | 1.03 (0.99-1.08)  | 0.107    |
| Habit of exercise            | -                | -        | -                | -        | 1.77 (0.83-3.79) | 0.140    | 1.75 (0.81-3.78)  | 0.153    |
| Habit of smoking             | -                | -        | -                | -        | 0.29 (0.07-1.12) | 0.072    | 0.29 (0.07-1.19)  | 0.086    |
| HbA1c (mmol/mol)             | -                | -        | -                | -        | -                | -        | 1.03 (0.995-1.07) | 0.090    |
| Insulin treatment            | -                | -        | -                | -        | -                | -        | 0.61 (0.23-1.60)  | 0.317    |
| Usage of SGLT2 inhibitor     | -                | -        | -                | -        | -                | -        | 0.52 (0.15-1.85)  | 0.314    |
| Usage of GLP-1 antagonist    | -                | -        | -                | -        | -                | -        | 0.79 (0.19-3.20)  | 0.736    |

  

| Men         | Model 1          |          | Model 2          |          | Model 3          |          | Model 4          |          |
|-------------|------------------|----------|------------------|----------|------------------|----------|------------------|----------|
|             | OR (95%CI)       | <i>p</i> |
| GNRI        | 0.90 (0.86-0.95) | <0.001   | 0.91 (0.87-0.95) | <0.001   | 0.90 (0.96-0.95) | <0.001   | 0.90 (0.86-0.95) | <0.001   |
| Age (years) | -                | -        | 1.13 (1.07-1.19) | <0.001   | 1.10 (1.05-1.18) | <0.001   | 1.11 (1.05-1.17) | <0.001   |

|                              |   |   |   |   |                  |       |                  |       |
|------------------------------|---|---|---|---|------------------|-------|------------------|-------|
| Duration of diabetes (years) | - | - | - | - | 1.02 (0.98-1.06) | 0.286 | 1.03 (0.99-1.07) | 0.163 |
| Habit of exercise            | - | - | - | - | 1.51 (0.70-3.29) | 0.297 | 0.15 (0.66-3.20) | 0.352 |
| Habit of smoking             | - | - | - | - | 0.21 (0.05-0.95) | 0.043 | 0.18 (0.03-0.91) | 0.038 |
| HbA1c (mmol/mol)             | - | - | - | - | -                | -     | 1.03 (0.99-1.07) | 0.150 |
| Insulin treatment            | - | - | - | - | -                | -     | 0.54 (0.21-1.44) | 0.218 |
| Usage of SGLT2 inhibitor     | - | - | - | - | -                | -     | 0.75 (0.19-2.91) | 0.676 |
| Usage of GLP-1 antagonist    | - | - | - | - | -                | -     | 1.07 (0.26-4.52) | 0.923 |

| Women                        | Model 1          |          | Model 2          |          | Model 3          |          | Model 4          |          |
|------------------------------|------------------|----------|------------------|----------|------------------|----------|------------------|----------|
|                              | OR (95%CI)       | <i>p</i> |
| Low GNRI (<98)               | 9.33 (2.17-40.1) | <0.001   | 7.00 (1.55-31.6) | 0.011    | 8.70 (1.67-45.3) | 0.010    | 11.3 (1.85-69.0) | 0.009    |
| Age (years)                  | -                | -        | 1.09 (1.02-1.15) | 0.006    | 1.08 (1.01-1.15) | 0.032    | 1.08 (1.01-1.16) | 0.035    |
| Duration of diabetes (years) | -                | -        | -                | -        | 1.06 (1.02-1.10) | 0.002    | 1.05 (1.01-1.10) | 0.009    |
| Habit of exercise            | -                | -        | -                | -        | 0.72 (0.27-1.95) | 0.521    | 0.82 (0.30-2.29) | 0.706    |
| Habit of smoking             | -                | -        | -                | -        | 4.46 (1.07-18.6) | 0.040    | 5.26 (1.22-22.8) | 0.026    |
| HbA1c (mmol/mol)             | -                | -        | -                | -        | -                | -        | 0.98 (0.94-1.03) | 0.472    |

|                           |   |   |   |   |   |   |                  |       |
|---------------------------|---|---|---|---|---|---|------------------|-------|
| Insulin treatment         | - | - | - | - | - | - | 1.19 (0.39-3.57) | 0.762 |
| Usage of SGLT2 inhibitor  | - | - | - | - | - | - | 0.59 (0.10-3.35) | 0.553 |
| Usage of GLP-1 antagonist | - | - | - | - | - | - | 0.94 (0.21-4.17) | 0.934 |

| Women                        | Model 1          |          | Model 2          |          | Model 3          |          | Model 4          |          |
|------------------------------|------------------|----------|------------------|----------|------------------|----------|------------------|----------|
|                              | OR (95%CI)       | <i>p</i> |
| GNRI                         | 0.86 (0.81-0.92) | <0.001   | 0.87 (0.82-0.93) | <0.001   | 0.88 (0.83-0.94) | <0.001   | 0.86 (0.80-0.93) | <0.001   |
| Age (years)                  | -                | -        | 1.06 (0.99-1.13) | 0.109    | 1.06 (0.98-1.13) | 0.146    | 1.06 (0.98-1.14) | 0.162    |
| Duration of diabetes (years) | -                | -        | -                | -        | 1.05 (1.01-1.09) | 0.020    | 1.04 (1.00-1.09) | 0.049    |
| Habit of exercise            | -                | -        | -                | -        | 0.59 (0.21-1.65) | 0.317    | 0.63 (0.22-1.83) | 0.394    |
| Habit of smoking             | -                | -        | -                | -        | 4.57 (0.98-21.4) | 0.054    | 5.27 (1.03-27.0) | 0.046    |
| HbA1c (mmol/mol)             | -                | -        | -                | -        | -                | -        | 0.98 (0.93-1.02) | 0.348    |
| Insulin treatment            | -                | -        | -                | -        | -                | -        | 0.95 (0.30-3.03) | 0.932    |
| Usage of SGLT2 inhibitor     | -                | -        | -                | -        | -                | -        | 0.93 (0.14-6.05) | 0.942    |
| Usage of GLP-1 antagonist    | -                | -        | -                | -        | -                | -        | 1.05 (0.18-6.10) | 0.958    |

Model 1 is unadjusted; Model 2 is adjusted for age, sex; Model 3 is adjusted for age, sex, duration of diabetes, habit of exercise, habit of

smoking; Model 4 is adjusted for age, sex, duration of diabetes, habit of exercise, habit of smoking, HbA1c, insulin treatment, usage of SGLT2 inhibitor, usage of GLP-1 antagonist. GNRI, Geriatric Nutritional Risk Index.
